# Supplementary material for: Assessment of Human Papillomavirus Vaccination in Primary Care Among Swiss University Students
Source: PubMed Central journal article supplement (PMC10031396; doi:10.1001/jamanetworkopen.2023.3949), 2023-03-21
Supplement: jamanetwopen-e233949-s001.pdf [file jamanetwopen-e233949-s001.pdf]

## Supplemental Online Content

Jäger L, Senn O, Rosemann T, Plate A. Assessment of human papillomavirus vaccination in primary care among Swiss university students. *JAMA Netw Open*. 2023;6(3):e233949. doi:10.1001/jamanetworkopen.2023.3949

**eTable 1.** Participating Educational Institutions

**eTable 2.** Survey Questions and Response Data (n = 5524)

**eReferences**

This supplemental material has been provided by the authors to give readers additional information about their work.

**eTable 1. Participating Educational Institutions**

| Institution                                  | Participating faculties/departments with healthcare-related programs (website)                                                                                                                                                                                                                                                                                                                       | Number of participating faculties/departments | Advertisement mode | Answering window         | Number of respondents |
|----------------------------------------------|------------------------------------------------------------------------------------------------------------------------------------------------------------------------------------------------------------------------------------------------------------------------------------------------------------------------------------------------------------------------------------------------------|-----------------------------------------------|--------------------|--------------------------|-----------------------|
| University of Zurich                         | Faculty of medicine: human medicine, dental medicine, chiropractic medicine<br>( <a href="https://www.med.uzh.ch/en.html">https://www.med.uzh.ch/en.html</a> )                                                                                                                                                                                                                                       | 7                                             | e-mail             | 11/11/2020 to 03/26/2021 | 3489                  |
| Swiss Federal Institute of Technology Zurich | –                                                                                                                                                                                                                                                                                                                                                                                                    | 12                                            | intranet/e-mail    | 12/01/2020 to 02/21/2021 | 839                   |
| Careum Bildungszentrum                       | Vocational college: health and social care, healthcare assistance, sterile processing technology<br>College of higher vocational education and training: nursing, biomedical laboratory diagnostics, radiology assisting, surgical assisting, dental hygiene<br>Health science: nursing<br>( <a href="https://careum.ch/en/areas/school-of-health">https://careum.ch/en/areas/school-of-health</a> ) | 3                                             | intranet/e-mail    | 11/26/2020 to 03/22/2021 | 398                   |
| Zurich University of Applied Sciences        | School of health sciences: occupational therapy, health promotion and prevention, midwifery, nursing, physiotherapy, biomedical laboratory diagnostics<br>( <a href="https://www.zhaw.ch/en/health/">https://www.zhaw.ch/en/health/</a> )                                                                                                                                                            | 8                                             | e-mail             | 02/01/2021 to 04/07/2021 | 1198                  |

**eTable 2. Survey Questions and Response Data (n = 5524).** Questions grouped by questionnaire section.

| ID                                                                | Question, No. (%)                                                                                                                                                 | Overall     | Stratified by gender          |                             |                           |
|-------------------------------------------------------------------|-------------------------------------------------------------------------------------------------------------------------------------------------------------------|-------------|-------------------------------|-----------------------------|---------------------------|
|                                                                   |                                                                                                                                                                   | n = 5524    | Female<br>n = 3878<br>(70.2%) | Male<br>n = 1618<br>(29.3%) | Other<br>n = 28<br>(0.5%) |
| <b>Knowledge on HPV vaccination</b>                               |                                                                                                                                                                   |             |                               |                             |                           |
| K1                                                                | Have you ever heard about human papillomaviruses (HPV)?                                                                                                           |             |                               |                             |                           |
|                                                                   | Yes                                                                                                                                                               | 3661 (66.3) | 2740 (70.7)                   | 902 (55.7)                  | 19 (67.9)                 |
|                                                                   | No                                                                                                                                                                | 1863 (33.7) | 1138 (29.3)                   | 716 (44.3)                  | 9 (32.1)                  |
| K2                                                                | In Switzerland, there is a vaccination that can safely and reliably protect against HPV infection (and thus against conditions caused by HPV). Did you know that? |             |                               |                             |                           |
|                                                                   | Yes                                                                                                                                                               | 3083 (55.8) | 2417 (62.3)                   | 651 (40.2)                  | 15 (53.6)                 |
|                                                                   | No                                                                                                                                                                | 2441 (44.2) | 1461 (37.7)                   | 967 (59.8)                  | 13 (46.4)                 |
| <b>Questions directed to respondents who answered “Yes” to K1</b> |                                                                                                                                                                   |             |                               |                             |                           |
|                                                                   |                                                                                                                                                                   | n = 3661    | n = 2740<br>(74.8%)           | n = 902<br>(24.6%)          | n = 19<br>(0.5%)          |
| K3                                                                | How high is the probability of contracting HPV during the course of your life, what would you guess?                                                              |             |                               |                             |                           |
|                                                                   | 0–20%                                                                                                                                                             | 965 (26.4)  | 688 (25.1)                    | 270 (29.9)                  | 7 (36.8)                  |
|                                                                   | 21–40%                                                                                                                                                            | 1150 (31.4) | 889 (32.4)                    | 257 (28.5)                  | 4 (21.1)                  |
|                                                                   | 41–60%                                                                                                                                                            | 691 (18.9)  | 553 (20.2)                    | 137 (15.2)                  | 1 (5.3)                   |
|                                                                   | 61–80%                                                                                                                                                            | 586 (16.0)  | 432 (15.8)                    | 148 (16.4)                  | 6 (31.6)                  |
|                                                                   | 81–100%                                                                                                                                                           | 263 (7.2)   | 174 (6.4)                     | 88 (9.8)                    | 1 (5.3)                   |
| K4                                                                | Which of the following gender groups do you believe is most commonly affected by HPV infection?                                                                   |             |                               |                             |                           |
|                                                                   | Women                                                                                                                                                             | 1813 (49.5) | 1428 (52.1)                   | 378 (41.9)                  | 7 (36.8)                  |
|                                                                   | Men                                                                                                                                                               | 475 (13.0)  | 333 (12.2)                    | 139 (15.4)                  | 3 (15.8)                  |
|                                                                   | Both genders equally                                                                                                                                              | 1181 (32.3) | 857 (31.3)                    | 321 (35.6)                  | 3 (15.8)                  |
|                                                                   | Don't know                                                                                                                                                        | 192 (5.2)   | 122 (4.5)                     | 64 (7.1)                    | 6 (31.6)                  |

Abbreviations: HPV, human papillomavirus.

**eTable 2 (continued).**

| ID                                   | Question, No. (%)                                                                                       | Overall         | Stratified by gender                 |                                    |                                  |
|--------------------------------------|---------------------------------------------------------------------------------------------------------|-----------------|--------------------------------------|------------------------------------|----------------------------------|
|                                      |                                                                                                         | <i>n</i> = 5524 | Female<br><i>n</i> = 3878<br>(70.2%) | Male<br><i>n</i> = 1618<br>(29.3%) | Other<br><i>n</i> = 28<br>(0.5%) |
| <b>Experience of HPV vaccination</b> |                                                                                                         |                 |                                      |                                    |                                  |
| E1                                   | Do you regularly visit a gynecologist for cervical cancer screening (by means of so-called PAP smears)? |                 |                                      |                                    |                                  |
|                                      | Yes                                                                                                     | 2729 (49.4)     | 2705 (69.8)                          | 14 (0.9)                           | 10 (35.7)                        |
|                                      | No                                                                                                      | 1085 (19.6)     | 1064 (27.4)                          | 16 (1.0)                           | 5 (17.9)                         |
|                                      | Don't know                                                                                              | 111 (2.0)       | 105 (2.7)                            | 5 (0.3)                            | 1 (3.6)                          |
|                                      | Not applicable                                                                                          | 1595 (28.9)     | 1 (0.0)                              | 1582 (97.8)                        | 12 (42.9)                        |
| E2                                   | Are you vaccinated against HPV (have you received at least one vaccine dose)?                           |                 |                                      |                                    |                                  |
|                                      | Yes                                                                                                     | 2037 (36.9)     | 1792 (46.2)                          | 237 (14.6)                         | 8 (28.6)                         |
|                                      | No                                                                                                      | 2108 (38.2)     | 1250 (32.2)                          | 848 (52.4)                         | 10 (35.7)                        |
|                                      | Can't remember                                                                                          | 1379 (25.0)     | 836 (21.6)                           | 533 (32.9)                         | 10 (35.7)                        |
| E3                                   | Has your GP ever addressed HPV vaccination?                                                             |                 |                                      |                                    |                                  |
|                                      | Yes                                                                                                     | 1023 (18.5)     | 892 (23.0)                           | 126 (7.8)                          | 5 (17.9)                         |
|                                      | No                                                                                                      | 3017 (54.6)     | 1921 (49.5)                          | 1085 (67.1)                        | 11 (39.3)                        |
|                                      | Don't know                                                                                              | 1122 (20.3)     | 836 (21.6)                           | 276 (17.1)                         | 10 (35.7)                        |
|                                      | I don't have a GP                                                                                       | 360 (6.5)       | 228 (5.9)                            | 130 (8.0)                          | 2 (7.1)                          |
| E4                                   | Have you ever asked your GP about HPV vaccination?                                                      |                 |                                      |                                    |                                  |
|                                      | Yes                                                                                                     | 595 (10.8)      | 461 (11.9)                           | 130 (8.0)                          | 4 (14.3)                         |
|                                      | No                                                                                                      | 4307 (78.0)     | 2979 (76.8)                          | 1309 (80.9)                        | 19 (67.9)                        |
|                                      | Don't know                                                                                              | 266 (4.8)       | 212 (5.5)                            | 51 (3.2)                           | 3 (10.7)                         |
|                                      | I don't have a GP                                                                                       | 356 (6.4)       | 226 (5.8)                            | 128 (7.9)                          | 2 (7.1)                          |

Abbreviations: GP, general practitioner; HPV, human papillomavirus; PAP, Papanicolaou.

eTable 2 (continued).

| ID                                                                                    | Question, No. (%)                                                 | Overall         | Stratified by gender                 |                                    |                                  |
|---------------------------------------------------------------------------------------|-------------------------------------------------------------------|-----------------|--------------------------------------|------------------------------------|----------------------------------|
|                                                                                       |                                                                   | <i>n</i> = 5524 | Female<br><i>n</i> = 3878<br>(70.2%) | Male<br><i>n</i> = 1618<br>(29.3%) | Other<br><i>n</i> = 28<br>(0.5%) |
| <b>Question directed to respondents who answered "Yes" to E2</b>                      |                                                                   |                 |                                      |                                    |                                  |
|                                                                                       |                                                                   | <i>n</i> = 2037 | <i>n</i> = 1792<br>(88.0%)           | <i>n</i> = 237<br>(11.6%)          | <i>n</i> = 8<br>(0.4%)           |
| E5                                                                                    | Where did you receive the HPV vaccine? ( <i>Multiple choice</i> ) |                 |                                      |                                    |                                  |
|                                                                                       | Pediatrician                                                      | 368 (18.1)      | 327 (18.2)                           | 39 (16.5)                          | 2 (25.0)                         |
|                                                                                       | GP                                                                | 740 (36.3)      | 584 (32.6)                           | 153 (64.6)                         | 3 (37.5)                         |
|                                                                                       | Gynecologist                                                      | 452 (22.2)      | 448 (25.0)                           | 3 (1.3)                            | 1 (12.5)                         |
|                                                                                       | Hospital                                                          | 25 (1.2)        | 20 (1.1)                             | 5 (2.1)                            | 0 (0.0)                          |
|                                                                                       | School physician                                                  | 456 (22.4)      | 441 (24.6)                           | 15 (6.3)                           | 0 (0.0)                          |
|                                                                                       | Don't know                                                        | 47 (2.3)        | 38 (2.1)                             | 9 (3.8)                            | 0 (0.0)                          |
|                                                                                       | Other                                                             | 63 (3.1)        | 37 (2.1)                             | 24 (10.1)                          | 2 (25.0)                         |
| <b>Questions directed to respondents who indicated "GP" among their answers to E3</b> |                                                                   |                 |                                      |                                    |                                  |
|                                                                                       |                                                                   | <i>n</i> = 740  | <i>n</i> = 584<br>(78.9%)            | <i>n</i> = 153<br>(20.7%)          | <i>n</i> = 3<br>(0.4%)           |
| E6                                                                                    | Under what circumstances did you receive the HPV vaccine?         |                 |                                      |                                    |                                  |
|                                                                                       | I asked my GP about HPV vaccination and they offered it           | 190 (25.7)      | 122 (20.9)                           | 67 (43.8)                          | 1 (33.3)                         |
|                                                                                       | My GP addressed HPV vaccination and offered it                    | 255 (34.5)      | 205 (35.1)                           | 49 (32.0)                          | 1 (33.3)                         |
|                                                                                       | The HPV vaccine was administered with other routine vaccines      | 174 (23.5)      | 144 (24.7)                           | 30 (19.6)                          | 0 (0.0)                          |
|                                                                                       | Other                                                             | 62 (8.4)        | 58 (9.9)                             | 4 (2.6)                            | 0 (0.0)                          |
|                                                                                       | Don't know                                                        | 58 (7.8)        | 54 (9.2)                             | 3 (2.0)                            | 1 (33.3)                         |

Abbreviations: GP, general practitioner; HPV, human papillomavirus.

**eTable 2 (continued).**

| ID                                                       | Question, No. (%)                                                                                                                                                                     | Overall<br>n = 5524 | Female<br>n = 3878<br>(70.2%) | Male<br>n = 1618<br>(29.3%) | Other<br>n = 28<br>(0.5%) |
|----------------------------------------------------------|---------------------------------------------------------------------------------------------------------------------------------------------------------------------------------------|---------------------|-------------------------------|-----------------------------|---------------------------|
| <b>Attitudes towards HPV vaccination in primary care</b> |                                                                                                                                                                                       |                     |                               |                             |                           |
| A1                                                       | Would you personally like more/better information in general regarding HPV, its association with cancer, and the possibility of prevention?                                           |                     |                               |                             |                           |
|                                                          | Yes, I would like more information                                                                                                                                                    | 3925 (71.1)         | 2726 (70.3)                   | 1179 (72.9)                 | 20 (71.4)                 |
|                                                          | No, I already feel sufficiently informed                                                                                                                                              | 1011 (18.3)         | 801 (20.7)                    | 206 (12.7)                  | 4 (14.3)                  |
|                                                          | No, I'd rather not address this topic                                                                                                                                                 | 224 (4.1)           | 120 (3.1)                     | 103 (6.4)                   | 1 (3.6)                   |
|                                                          | Don't know                                                                                                                                                                            | 364 (6.6)           | 231 (6.0)                     | 130 (8.0)                   | 3 (10.7)                  |
| A2                                                       | Would you wish to be informed about HPV at your GP's office, independently of whether you are vaccinated against HPV or not?                                                          |                     |                               |                             |                           |
|                                                          | Yes                                                                                                                                                                                   | 4778 (86.5)         | 3375 (87.0)                   | 1378 (85.2)                 | 25 (89.3)                 |
|                                                          | No                                                                                                                                                                                    | 355 (6.4)           | 224 ( 5.8)                    | 129 ( 8.0)                  | 2 ( 7.1)                  |
| A3                                                       | Would you consider the following encounter occasions to be appropriate opportunities to inform you about HPV vaccination? ( <i>Likert scale with additional "No opinion" option</i> ) |                     |                               |                             |                           |
| A3-1                                                     | Encounter in the context of a check-up                                                                                                                                                |                     |                               |                             |                           |
|                                                          | Very inappropriate                                                                                                                                                                    | 11 (0.2)            | 9 (0.2)                       | 2 (0.1)                     | 0 (0.0)                   |
|                                                          | Rather inappropriate                                                                                                                                                                  | 24 (0.4)            | 20 (0.5)                      | 4 (0.2)                     | 0 (0.0)                   |
|                                                          | Neither inappropriate nor appropriate                                                                                                                                                 | 105 (1.9)           | 79 (2.0)                      | 25 (1.5)                    | 1 (3.6)                   |
|                                                          | Rather appropriate                                                                                                                                                                    | 1501 (27.2)         | 1053 (27.2)                   | 436 (26.9)                  | 12 (42.9)                 |
|                                                          | Very appropriate                                                                                                                                                                      | 3127 (56.6)         | 2208 (56.9)                   | 908 (56.1)                  | 11 (39.3)                 |
|                                                          | No opinion                                                                                                                                                                            | 756 (13.4)          | 509 (13.1)                    | 243 (15.0)                  | 4 (14.3)                  |
| A3-2                                                     | Encounter in the context of another vaccination                                                                                                                                       |                     |                               |                             |                           |
|                                                          | Very inappropriate                                                                                                                                                                    | 24 (0.4)            | 17 ( 0.4)                     | 7 ( 0.4)                    | 0 ( 0.0)                  |
|                                                          | Rather inappropriate                                                                                                                                                                  | 106 (1.9)           | 81 ( 2.1)                     | 23 ( 1.4)                   | 2 ( 7.1)                  |
|                                                          | Neither inappropriate nor appropriate                                                                                                                                                 | 186 (3.4)           | 148 ( 3.8)                    | 38 ( 2.3)                   | 0 ( 0.0)                  |
|                                                          | Rather appropriate                                                                                                                                                                    | 1585 (28.7)         | 1129 (29.1)                   | 448 (27.7)                  | 8 (28.6)                  |
|                                                          | Very appropriate                                                                                                                                                                      | 2851 (51.6)         | 1979 (51.0)                   | 857 (53.0)                  | 15 (53.6)                 |
|                                                          | No opinion                                                                                                                                                                            | 772 (14.0)          | 524 (13.5)                    | 245 (15.1)                  | 3 (10.7)                  |
| A3-3                                                     | Encounter in the context of an acute illness                                                                                                                                          |                     |                               |                             |                           |
|                                                          | Very inappropriate                                                                                                                                                                    | 869 (15.7)          | 638 (16.5)                    | 227 (14.0)                  | 4 (14.3)                  |
|                                                          | Rather inappropriate                                                                                                                                                                  | 1727 (31.3)         | 1268 (32.7)                   | 447 (27.6)                  | 12 (42.9)                 |
|                                                          | Neither inappropriate nor appropriate                                                                                                                                                 | 1003 (18.2)         | 712 (18.4)                    | 286 (17.7)                  | 5 (17.9)                  |
|                                                          | Rather appropriate                                                                                                                                                                    | 692 (12.5)          | 426 (11.0)                    | 263 (16.3)                  | 3 (10.7)                  |
|                                                          | Very appropriate                                                                                                                                                                      | 403 (7.3)           | 269 ( 6.9)                    | 133 ( 8.2)                  | 1 ( 3.6)                  |
|                                                          | No opinion                                                                                                                                                                            | 830 (15.0)          | 565 (14.6)                    | 262 (16.2)                  | 3 (10.7)                  |

Abbreviations: GP, general practitioner; HPV, human papillomavirus.

**eTable 2 (continued).**

| ID                                                               | Question, No. (%)                                                                                                                                      | Overall<br><i>n</i> = 5524 | Female<br><i>n</i> = 3878<br>(70.2%) | Male<br><i>n</i> = 1618<br>(29.3%) | Other<br><i>n</i> = 28<br>(0.5%) |
|------------------------------------------------------------------|--------------------------------------------------------------------------------------------------------------------------------------------------------|----------------------------|--------------------------------------|------------------------------------|----------------------------------|
| <b>Question directed to respondents who answered “Yes” to A1</b> |                                                                                                                                                        |                            |                                      |                                    |                                  |
|                                                                  |                                                                                                                                                        | <i>n</i> = 3925            | <i>n</i> = 2726<br>(69.5%)           | <i>n</i> = 1179<br>(30.0%)         | <i>n</i> = 20<br>(0.5%)          |
| A4                                                               | Where would you like to obtain more information about HPV from? ( <i>Multiple choice</i> )                                                             |                            |                                      |                                    |                                  |
|                                                                  | Physician’s office                                                                                                                                     | 2636 (67.2)                | 1952 (71.6)                          | 669 (56.7)                         | 15 (75.0)                        |
|                                                                  | School/university/educational institutions                                                                                                             | 2857 (72.8)                | 2009 (73.7)                          | 830 (70.4)                         | 18 (90.0)                        |
|                                                                  | Media                                                                                                                                                  | 1639 (41.8)                | 1097 (40.2)                          | 538 (45.6)                         | 4 (20.0)                         |
|                                                                  | Internet                                                                                                                                               | 1115 (28.4)                | 672 (24.7)                           | 438 (37.2)                         | 5 (25.0)                         |
|                                                                  | Campaigns by the Federal Office of Public Health                                                                                                       | 2282 (58.1)                | 1557 (57.1)                          | 712 (60.4)                         | 13 (65.0)                        |
|                                                                  | Other                                                                                                                                                  | 44 (1.1)                   | 19 (0.7)                             | 25 (2.1)                           | 0 (0.0)                          |
| <b>Question directed to respondents who answered “Yes” to A2</b> |                                                                                                                                                        |                            |                                      |                                    |                                  |
|                                                                  |                                                                                                                                                        | <i>n</i> = 4778            | <i>n</i> = 3375<br>(70.6%)           | <i>n</i> = 1378<br>(28.8%)         | <i>n</i> = 25<br>(0.5%)          |
| A5                                                               | Which of the following sources would you consider appropriate if your GP office wanted to inform you about HPV vaccination? ( <i>Multiple choice</i> ) |                            |                                      |                                    |                                  |
|                                                                  | GP themselves                                                                                                                                          | 4258 (89.1)                | 2996 (88.8)                          | 1242 (90.1)                        | 20 (80.0)                        |
|                                                                  | Practice employees (such as medical assistants)                                                                                                        | 1141 (23.9)                | 774 (22.9)                           | 357 (25.9)                         | 10 (40.0)                        |
|                                                                  | Poster or flyer in waiting room                                                                                                                        | 2426 (50.8)                | 1723 (51.1)                          | 690 (50.1)                         | 13 (52.0)                        |
|                                                                  | Other                                                                                                                                                  | 103 (2.2)                  | 68 (2.0)                             | 34 (2.5)                           | 1 (4.0)                          |
| <b>Demographic characteristics</b>                               |                                                                                                                                                        |                            |                                      |                                    |                                  |
| D1                                                               | How old are you in years?                                                                                                                              | Median 23<br>(IQR 21–25)   | Median 23<br>(IQR 21–25)             | Median 23<br>(IQR 21–25)           | Median 23.5<br>(IQR 21–25)       |
| D2                                                               | What is your gender?                                                                                                                                   |                            |                                      |                                    |                                  |
|                                                                  | Female                                                                                                                                                 | 3878 (70.2)                | 3878 (100)                           | 0 (0.0)                            | 0 (0.0)                          |
|                                                                  | Male                                                                                                                                                   | 1618 (29.3)                | 0 (0.0)                              | 1618 (100)                         | 0 (0.0)                          |
|                                                                  | Other                                                                                                                                                  | 28 (0.5)                   | 0 (0.0)                              | 0 (0.0)                            | 28 (100)                         |
| D3                                                               | Which health insurance model do you have?                                                                                                              |                            |                                      |                                    |                                  |
|                                                                  | Standard model (free choice)                                                                                                                           | 1031 (18.7)                | 739 (19.1)                           | 289 (17.9)                         | 3 (10.7)                         |
|                                                                  | Other models (managed care)                                                                                                                            | 3536 (64.0)                | 2467 (63.6)                          | 1047 (64.7)                        | 22 (78.6)                        |
|                                                                  | Don’t know                                                                                                                                             | 957 (17.3)                 | 672 (17.3)                           | 282 (17.4)                         | 3 (10.7)                         |
| D4                                                               | In which department are you enrolled? ( <i>Dropdown with the list of the educational institution’s participating department</i> )                      |                            |                                      |                                    |                                  |
|                                                                  | Department with healthcare-related programs only                                                                                                       | 1598 (28.9)                | 1276 (32.9)                          | 315 (19.5)                         | 7 (25.0)                         |
|                                                                  | Department with no healthcare-related programs                                                                                                         | 3926 (71.1)                | 2602 (67.1)                          | 1303 (80.5)                        | 21 (75.0)                        |
| D5                                                               | Where did you mostly live between the ages of 11 and 18?                                                                                               |                            |                                      |                                    |                                  |
|                                                                  | Switzerland                                                                                                                                            | 5051 (91.4)                | 3593 (92.7)                          | 1432 (88.5)                        | 26 (92.9)                        |
|                                                                  | Outside Switzerland                                                                                                                                    | 473 (8.5)                  | 285 (7.3)                            | 186 (11.4)                         | 2 (7.1)                          |

Abbreviations: GP, general practitioner; HPV, human papillomavirus; IQR, interquartile range.

## eReferences

1. Eysenbach G. Improving the quality of Web surveys: the Checklist for Reporting Results of Internet E-Surveys (CHERRIES). *J Med Internet Res*. Sep 29 2004;6(3):e34. doi:10.2196/jmir.6.3.e34
2. Federal Act on Research Involving Human Beings of 30 September 2011 (Status as of 1 January 2020). Accessed November 20, 2022. <https://www.admin.ch/opc/en/classified-compilation/20061313/index.html>
3. Vandembroucke JP, von Elm E, Altman DG, et al. Strengthening the Reporting of Observational Studies in Epidemiology (STROBE): explanation and elaboration. *PLoS Med*. Oct 16 2007;4(10):e297. doi:10.1371/journal.pmed.0040297
