# Supplementary material for: Assessment of Human Papillomavirus Vaccination in Primary Care Among Swiss University Students
Source: PubMed Central journal article supplement (PMC10031396; doi:10.1001/jamanetworkopen.2023.3949), 2023-03-21
Supplement: jamanetwopen-e233949-s002.pdf [file jamanetwopen-e233949-s002.pdf]

## Data Sharing Statement

Jäger. Assessment of Human Papillomavirus Vaccination in Primary Care Among Swiss University Students. *JAMA Netw Open*. Published March 21, 2023.  
doi:10.1001/jamanetworkopen.2023.3949

### Data

**Data available:** Yes

**Data types:** Data (not involving human participants), Data dictionary

**How to access data:** The data used in the current study are available from the corresponding author Dr. Levy Jäger ([levy.jaeger@usz.ch](mailto:levy.jaeger@usz.ch)) upon reasonable request.

**When available:** With publication

### Supporting Documents

**Document types:** Statistical/analytic code

**How to access documents:** The statistical/analytic code are available from the corresponding author Dr. Levy Jäger ([levy.jaeger@usz.ch](mailto:levy.jaeger@usz.ch)) upon reasonable request.

**When available:** With publication

### Additional Information

**Who can access the data:** The data will be available to researchers whose proposed use of the data has been approved.

**Types of analyses:** The data will be made available for scientific research purposes.

**Mechanisms of data availability:** The data will be made available after approval of a proposal and with a signed data access agreement.
